# Supplementary material
Source: publisher figshare collection journal article supplement (https://frontiersin.figshare.com/ndownloader/files/23013356)
Supplement: Supplementary file [file 23013356]

## SUPPLEMENTARY MATERIAL

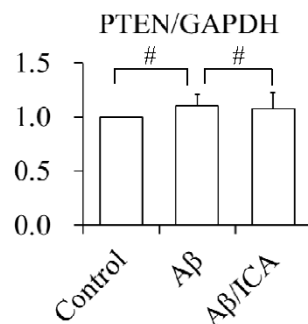

**FIGURE S1.** The effect of A $\beta$  and icariin on PTEN mRNA levels. SK-N-MC cells were serum-starved for 6 h and then treated with or without 2.5 mM of A $\beta$  1-42, in the presence or absence of 50  $\mu$ M of icariin for 24 h. RT-qPCR was performed as described in Methods. GAPDH was used as an internal control. The primer sequences of human GAPDH (NM\_002046.4) was as follows: forward 5'-GTCTCCTCTGACTTCAACAGCG-3', reverse 5'-ACCACCCTGTTGCTGTAGCCAA-3'. N = 4. #  $p > 0.05$  vs. indicated group.
